# Supplementary figures and images for: High NaCl–induced activation of CDK5 increases phosphorylation of the osmoprotective transcription factor TonEBP/OREBP at threonine 135, which contributes to its rapid nuclear localization
Source: PubMed Central journal article supplement — Mol Biol Cell. 2011 Mar 1;22(5):703–14. doi: 10.1091/mbc.E10-08-0681 (PMC3046065; doi:10.1091/mbc.e10-08-0681), 2011-03-01

A Peptide TonEBP/OREBP-130-139 anti-P-S134

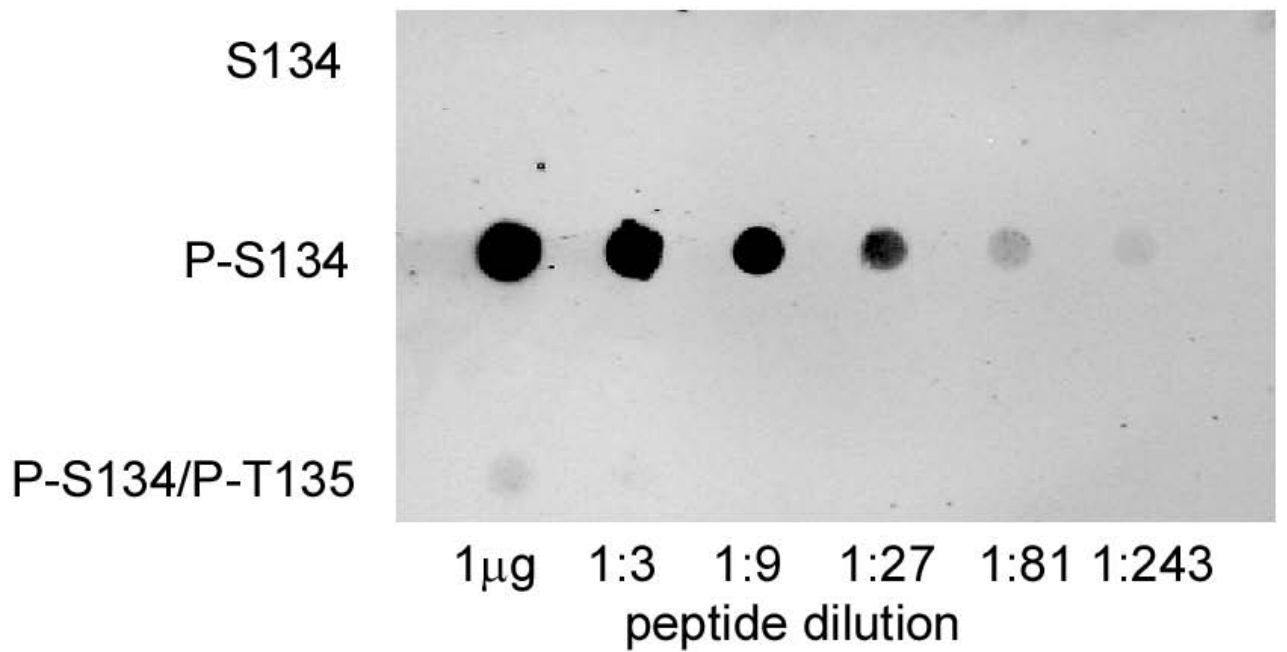

B Peptide TonE/OREBP-130-139 IB Anti-P-T135

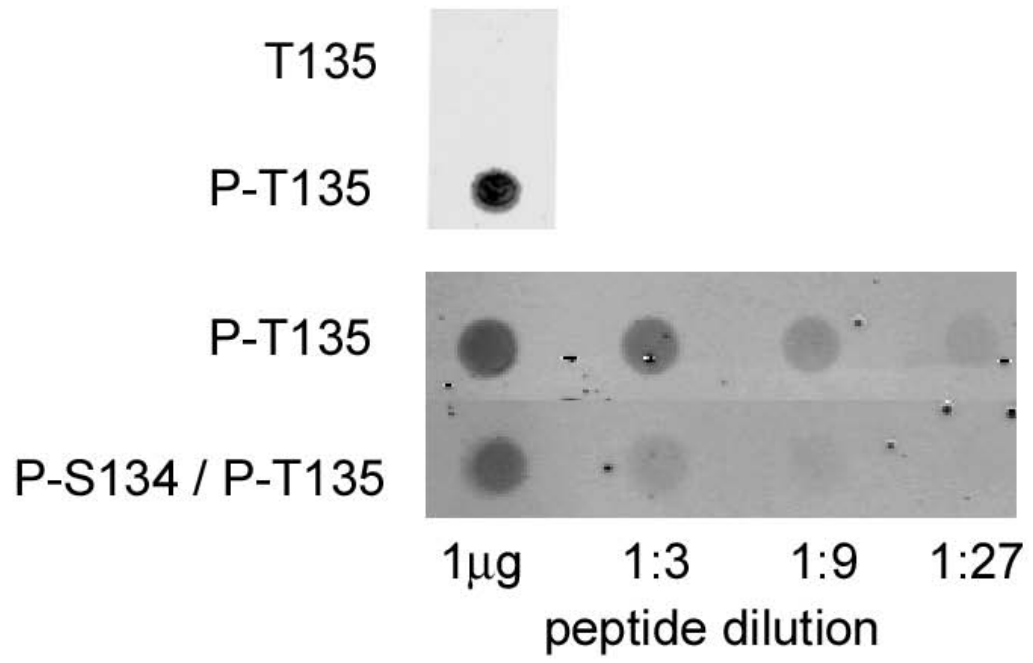

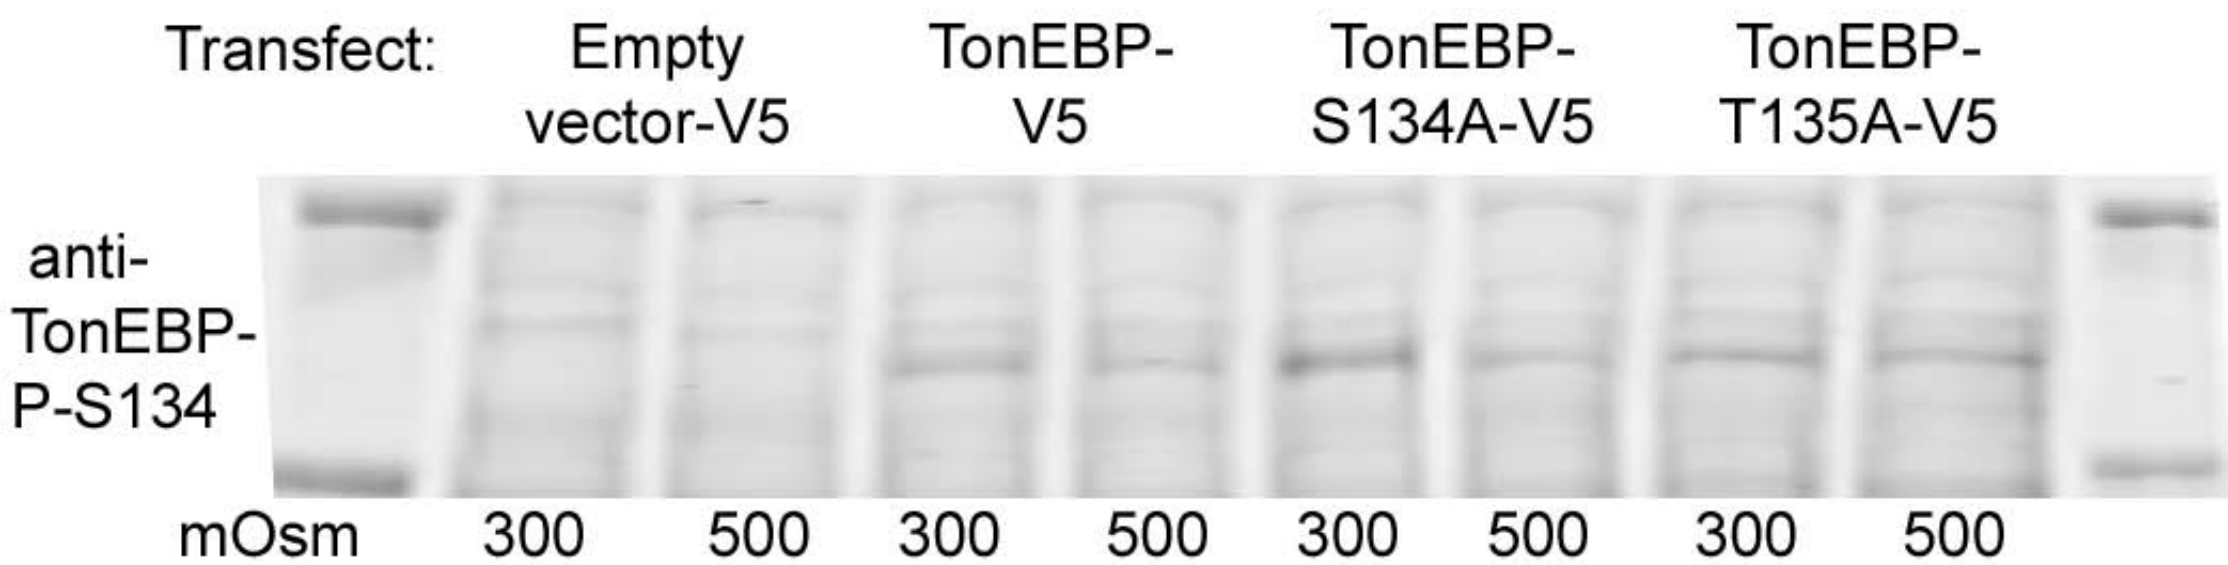

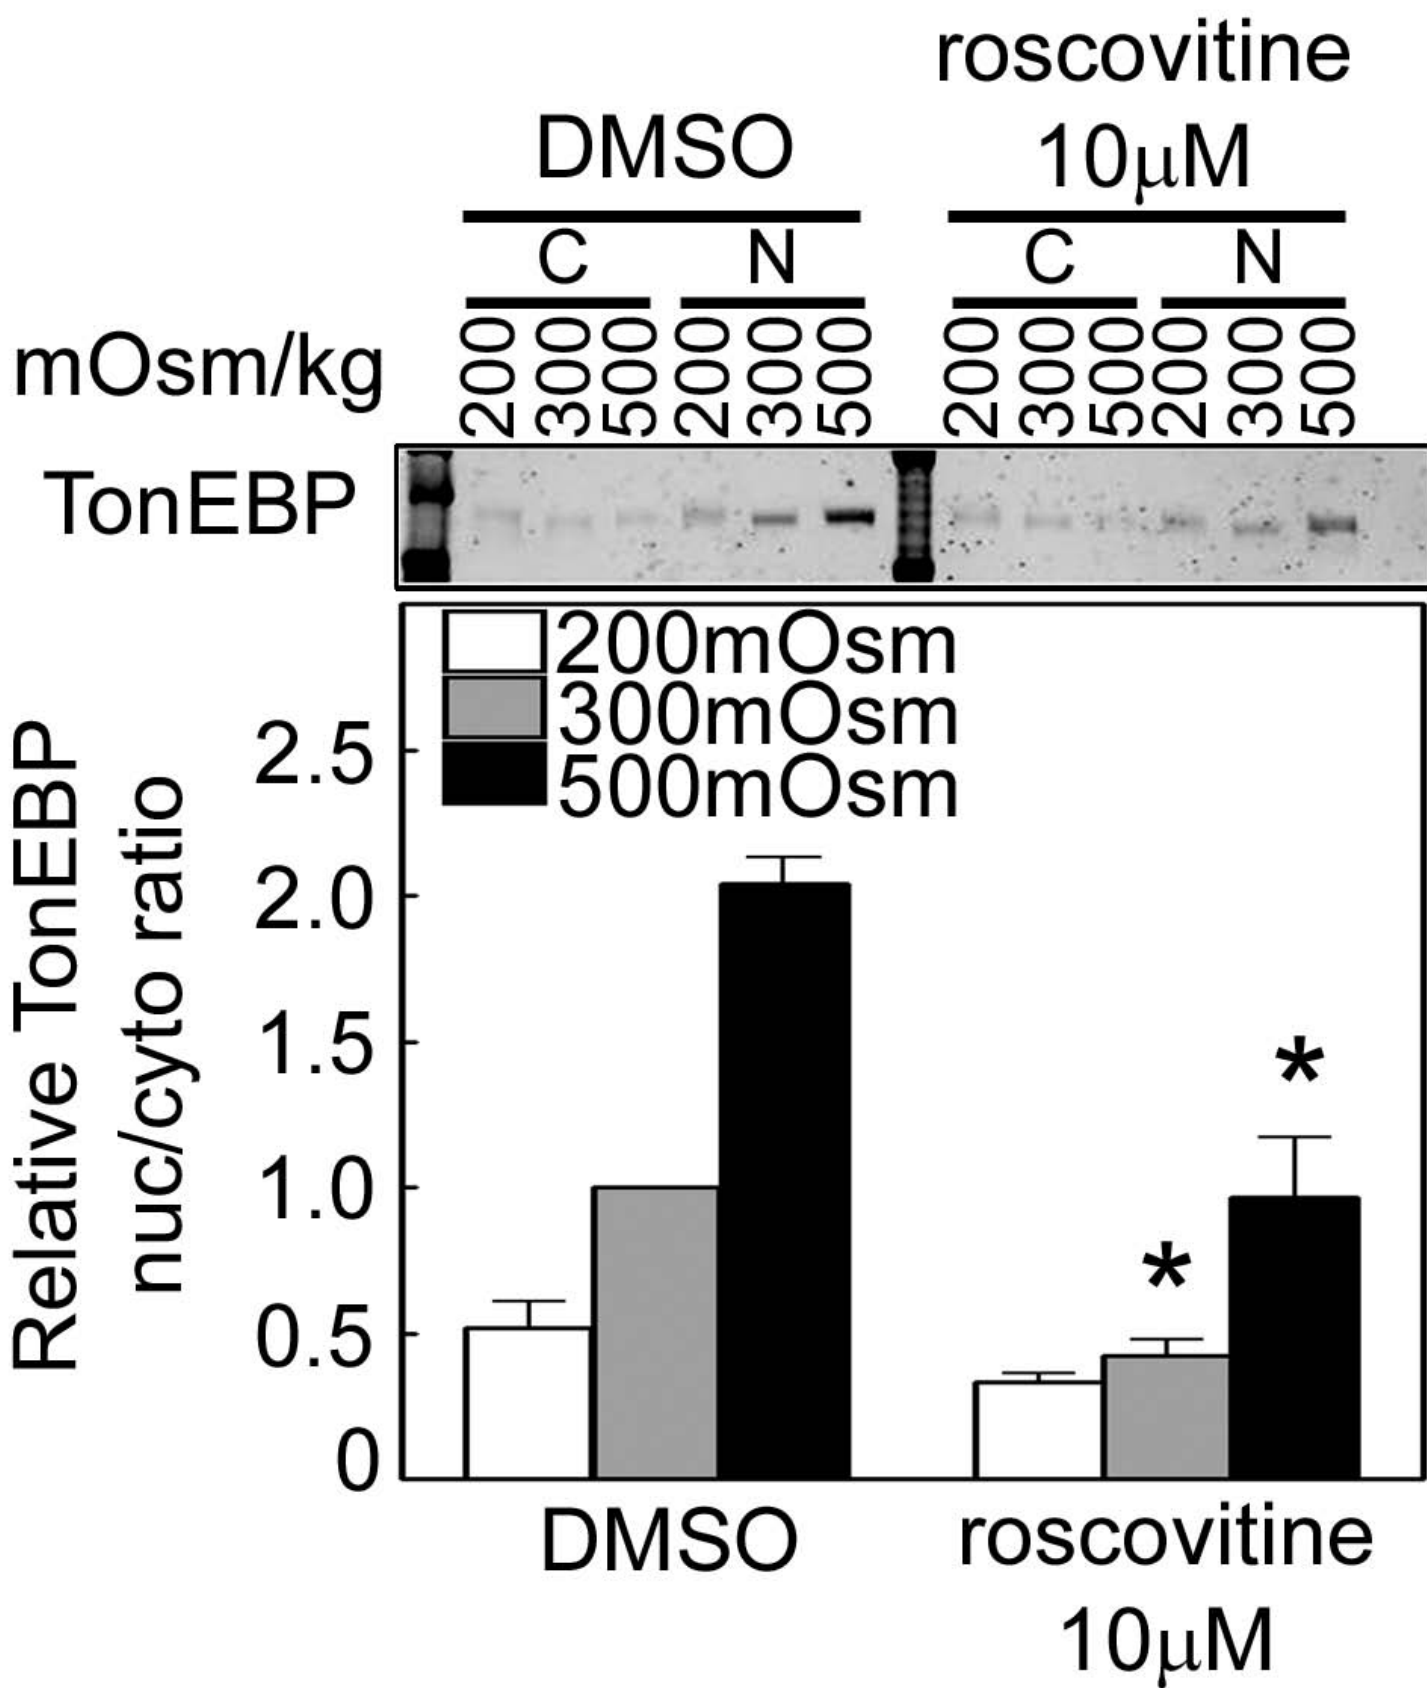

Supplement: E10-08-0681_1.pdf [file E10-08-0681_1.pdf]
